# Supplementary material for: Large deep-sea zooplankton biomass mirrors primary production in the global ocean
Source: PubMed Central journal article supplement (PMC7695708; doi:10.1038/s41467-020-19875-7), 2020-11-27
Supplement: 41467_2020_19875_MOESM1_ESM.pdf [file 41467_2020_19875_MOESM1_ESM.pdf]

## Supplementary Information

Supplementary Table 1. Regression data of the zooplankton biomass (ZB,  $\text{mgC}\cdot\text{m}^{-3}$ ) decrease with depth (z, km) for the different biomes ( $\text{LnZB} = az+b$ ). Northern and southern polar biomes were considered separately because of the large biomasses reported in the north. Mediterranean data are also considered apart because of the oligotrophy of this waters within the Westerlies.

| Biome           | Equation                                       | $r^2$ | $p <$ | n    |
|-----------------|------------------------------------------------|-------|-------|------|
| Trades          | $\text{LnZB} = 0.470 - 1.334 \cdot \text{km}$  | 0.646 | 0.001 | 476  |
| Westerlies      | $\text{LnZB} = 0.930 - 1.023 \cdot \text{km}$  | 0.440 | 0.001 | 924  |
| Polar North     | $\text{LnZB} = 2.436 - 0.878 \cdot \text{km}$  | 0.159 | 0.001 | 78   |
| Polar South     | $\text{LnZB} = 0.935 - 1.144 \cdot \text{km}$  | 0.267 | 0.001 | 210  |
| Coastal         | $\text{LnZB} = 0.597 - 1.131 \cdot \text{km}$  | 0.622 | 0.001 | 262  |
| Mediterranean   | $\text{LnZB} = -0.436 - 1.354 \cdot \text{km}$ | 0.649 | 0.001 | 596  |
| <b>All data</b> | $\text{LnZB} = 0.568 - 1.214 \cdot \text{km}$  | 0.477 | 0.001 | 2546 |

Supplementary Table 2. Regression data of the zooplankton  $\delta^{15}\text{N}$  (‰) decrease with depth (m) for the Coastal and Trades biomes.

| Biome   | Equation                                                 | $r^2$ | $p <$ | n   |
|---------|----------------------------------------------------------|-------|-------|-----|
| Coastal | $\delta^{15}\text{N} = 9.897 - 0.243 \text{ depth (km)}$ | 0.004 | 0.666 | 46  |
| Trades  | $\delta^{15}\text{N} = 6.006 + 4.230 \text{ depth (km)}$ | 0.269 | 0.001 | 123 |

Supplementary Table 3. Respiration rates in the bathypelagic zone obtained during the Malaspina cruise for different size classes using the electron transfer system (ETS) activity as a proxy. “Prot” stands for protein, “dw” for dry weight, “SD” for standard deviation, and “n” the number of samples.

| Station | Depth (m) | Size fraction ( $\mu\text{m}$ ) | Temperature ( $^{\circ}\text{C}$ ) | sp ETS in situ ( $\mu\text{lO}_2 \cdot \text{mgprot}^{-1} \cdot \text{h}^{-1}$ ) | Respiration ( $\mu\text{lO}_2 \cdot \text{mgdw}^{-1} \cdot \text{h}^{-1}$ ) | Respiration ( $\text{d}^{-1}$ ) |
|---------|-----------|---------------------------------|------------------------------------|----------------------------------------------------------------------------------|-----------------------------------------------------------------------------|---------------------------------|
| 12      | 1000-2000 | >1000                           | 4.31                               | 3.30                                                                             | 0.66                                                                        | 0.021                           |
| 12      | 1000-2000 | 1000-500                        | 4.31                               | 1.42                                                                             | 0.29                                                                        | 0.009                           |
| 12      | 1000-2000 | 500-300                         | 4.31                               | 0.35                                                                             | 0.07                                                                        | 0.002                           |
| 35      | 1000-2000 | >1000                           | 2.99                               | 0.79                                                                             | 0.16                                                                        | 0.005                           |
| 35      | 1000-2000 | 1000-500                        | 2.99                               | 2.66                                                                             | 0.53                                                                        | 0.017                           |
| 35      | 1000-2000 | 500-300                         | 2.99                               | 1.96                                                                             | 0.39                                                                        | 0.012                           |
| 39      | 1000-2000 | >1000                           | 3.10                               | 1.52                                                                             | 0.31                                                                        | 0.010                           |
| 39      | 1000-2000 | 1000-500                        | 3.10                               | 3.85                                                                             | 0.77                                                                        | 0.024                           |
| 39      | 1000-2000 | 500-300                         | 3.10                               | 0.02                                                                             | 0.00                                                                        | 0.000                           |
| 45      | 1000-2000 | >1000                           | 4.59                               | 0.74                                                                             | 0.15                                                                        | 0.005                           |
| 45      | 1000-2000 | 1000-500                        | 4.59                               | 0.47                                                                             | 0.09                                                                        | 0.003                           |
| 45      | 1000-2000 | 500-300                         | 4.59                               | 1.14                                                                             | 0.23                                                                        | 0.007                           |
| 60      | 1000-2000 | >300                            | 3.29                               | 3.79                                                                             | 0.76                                                                        | 0.024                           |
| 69      | 1000-2000 | >1000                           | 2.91                               | 0.27                                                                             | 0.05                                                                        | 0.002                           |
| 69      | 1000-2000 | >1000                           | 2.91                               | 0.27                                                                             | 0.05                                                                        | 0.002                           |
| 69      | 1000-2000 | 1000-500                        | 2.91                               | 9.83                                                                             | 1.97                                                                        | 0.062                           |
| 69      | 1000-2000 | 500-300                         | 2.91                               | 0.20                                                                             | 0.04                                                                        | 0.001                           |
| 71      | 1000-2000 | >1000                           | 3.01                               | 3.28                                                                             | 0.66                                                                        | 0.021                           |
| 71      | 1000-2000 | >1000                           | 3.01                               | 2.39                                                                             | 0.48                                                                        | 0.015                           |
| 71      | 1000-2000 | >1000                           | 3.01                               | 0.81                                                                             | 0.16                                                                        | 0.005                           |
| 71      | 1000-2000 | 1000-500                        | 3.01                               | 1.69                                                                             | 0.34                                                                        | 0.011                           |
| 84      | 1000-1500 | >1000                           | 2.47                               | 0.10                                                                             | 0.02                                                                        | 0.001                           |
| 84      | 1000-1500 | 1000-500                        | 2.47                               | 0.07                                                                             | 0.01                                                                        | 0.000                           |
| 84      | 1000-1500 | 500-300                         | 2.47                               | 1.62                                                                             | 0.33                                                                        | 0.010                           |
| 84      | 1000-1500 | >1000                           | 3.27                               | 0.44                                                                             | 0.09                                                                        | 0.003                           |
| 84      | 1000-1500 | 1000-500                        | 3.27                               | 0.56                                                                             | 0.11                                                                        | 0.004                           |
| 84      | 1000-1500 | 500-300                         | 3.27                               | 6.02                                                                             | 1.21                                                                        | 0.038                           |
| 92      | 1000-2000 | >1000                           | 3.23                               | 1.27                                                                             | 0.26                                                                        | 0.008                           |
| 92      | 1000-2000 | 1000-500                        | 3.23                               | 0.51                                                                             | 0.10                                                                        | 0.003                           |
| 92      | 1000-2000 | 500-300                         | 3.23                               | 0.92                                                                             | 0.18                                                                        | 0.006                           |
| 136     | 1000-2000 | >1000                           | 3.29                               | 1.22                                                                             | 0.24                                                                        | 0.008                           |
| 136     | 1000-2000 | 500-1000                        | 3.29                               | 0.40                                                                             | 0.08                                                                        | 0.003                           |
| 136     | 1000-2000 | 500-300                         | 3.29                               | 0.56                                                                             | 0.11                                                                        | 0.004                           |
| Average |           |                                 |                                    |                                                                                  | 0.33                                                                        | 0.010                           |
| SD      |           |                                 |                                    |                                                                                  | 0.37                                                                        | 0.012                           |
| n       |           |                                 |                                    |                                                                                  |                                                                             | 33                              |

Supplementary Table 4. Values for the different domains and provinces used in this review for the 1000-2000, 2000-3000 and 3000-4000 m layers. N is the number of profiles obtained for each oceanic province and SD is standard deviation.

| Domain             | Ocean    | Province | Biomass at<br>1000-2000 m<br>mgC·m <sup>-2</sup> | Remineralization<br>1000-2000 m<br>gC·m <sup>-2</sup> ·y <sup>-1</sup> | SD    | n          | Area of<br>provinces<br>10 <sup>6</sup> Km <sup>2</sup><br>Longhurst (1995) | Remineralization<br>1000-2000 m<br>TgC·y <sup>-1</sup><br>This study | Primary<br>Production<br>gC·m <sup>-2</sup> ·y <sup>-1</sup><br>Longhurst (1995) |
|--------------------|----------|----------|--------------------------------------------------|------------------------------------------------------------------------|-------|------------|-----------------------------------------------------------------------------|----------------------------------------------------------------------|----------------------------------------------------------------------------------|
| Trades             | Atlantic | NATR     | 32.6                                             | 0.12                                                                   | 0.41  | 3          | 8.27                                                                        | 0.98                                                                 | 106                                                                              |
|                    |          | WTRA     | 26.8                                             | 0.1                                                                    | 0.04  | 3          | 5.36                                                                        | 0.52                                                                 | 130                                                                              |
|                    |          | SATL     | 36.5                                             | 0.13                                                                   | 1.13  | 11         | 17.77                                                                       | 2.37                                                                 | 75                                                                               |
| Trades             | Indian   | MONS     | 199.5                                            | 0.73                                                                   | 0.37  | 30         | 14.21                                                                       | 10.35                                                                | 105                                                                              |
|                    |          | ISSG     | 78.0                                             | 0.28                                                                   | 0.22  | 15         | 19.25                                                                       | 5.48                                                                 | 71                                                                               |
| Trades             | Pacific  | NPTG     | 67.2                                             | 0.25                                                                   | 0.29  | 5          | 21.09                                                                       | 5.17                                                                 | 59                                                                               |
|                    |          | PNEC     | 120.0                                            | 0.44                                                                   | 0.23  | 5          | 8.17                                                                        | 3.58                                                                 | 107                                                                              |
|                    |          | PEQD     | 51.5                                             | 0.19                                                                   | 0.12  | 4          | 10.34                                                                       | 1.95                                                                 | 113                                                                              |
|                    |          | WARM     | 57.6                                             | 0.21                                                                   | 0.02  | 3          | 16.78                                                                       | 3.53                                                                 | 82                                                                               |
| Westerlies         | Atlantic | ARCH     | 288.0                                            | 1.05                                                                   |       | 1          | 8.84                                                                        | 9.29                                                                 | 100                                                                              |
|                    |          | NADR     | 402.9                                            | 1.47                                                                   | 2     | 12         | 3.5                                                                         | 5.15                                                                 | 240                                                                              |
|                    |          | GFST     | 2784.0                                           | 10.16                                                                  |       | 1          | 1.1                                                                         | 11.18                                                                | 178                                                                              |
|                    |          | MEDI     | 47.3                                             | 0.17                                                                   | 0.53  | 29         | 3.08                                                                        | 0.53                                                                 | 216                                                                              |
| Westerlies         | Pacific  | NASE     | 81.7                                             | 0.3                                                                    | 0.86  | 8          | 4.45                                                                        | 1.33                                                                 | 122                                                                              |
|                    |          | PSAW     | 2280.0                                           | 8.32                                                                   | 2.2   | 14         | 2.9                                                                         | 24.13                                                                | 264                                                                              |
|                    |          | KURO     | 1955.0                                           | 7.14                                                                   | 3.1   | 2          | 3.7                                                                         | 26.4                                                                 | 193                                                                              |
|                    |          | NPSW     | 139.4                                            | 0.51                                                                   | 0.71  | 8          | 3.93                                                                        | 2                                                                    | 109                                                                              |
| Westerlies         | Southern | SPSG     | 50.4                                             | 0.18                                                                   | 0.29  | 7          | 37.29                                                                       | 6.86                                                                 | 87                                                                               |
|                    |          | SSTC     | 241.8                                            | 0.88                                                                   | 0.49  | 17         | 16.84                                                                       | 14.86                                                                | 136                                                                              |
| Westerlies         | Southern | SANT     | 241.8                                            | 0.88                                                                   | 0.59  | 27         | 30.25                                                                       | 26.7                                                                 | 120                                                                              |
| Coastal            | Indian   | REDS     | 9.6                                              | 0.04                                                                   | 0.02  | 7          | 0.56                                                                        | 0.02                                                                 | 617                                                                              |
|                    |          | ARAB     | 375.1                                            | 1.38                                                                   | 0.33  | 13         | 2.93                                                                        | 4.06                                                                 | 454                                                                              |
|                    |          | EAFR     | 287.7                                            | 1.05                                                                   | 0.33  | 2          | 3.72                                                                        | 3.91                                                                 | 190                                                                              |
|                    |          | AUSW     | 289.8                                            | 1.06                                                                   | 0.99  | 2          | 2.94                                                                        | 3.11                                                                 | 199                                                                              |
| Coastal            | Atlantic | BENG     | 196.7                                            | 0.72                                                                   | 0.06  | 2          | 1.13                                                                        | 0.81                                                                 | 323                                                                              |
| Coastal            | Pacific  | CCAL     | 205.2                                            | 0.75                                                                   | 0.34  | 3          | 0.96                                                                        | 0.72                                                                 | 388                                                                              |
|                    |          | AUSE     | 613.1                                            | 2.24                                                                   |       | 1          | 1.14                                                                        | 2.55                                                                 | 232                                                                              |
| Polar              | Atlantic | SARC     | 2593.5                                           | 9.47                                                                   | 9.97  | 2          | 2.33                                                                        | 22.06                                                                | 302                                                                              |
|                    |          | ARCTIC   | 2051.7                                           | 7.49                                                                   | 22.92 | 8          | 2.1                                                                         | 15.73                                                                | 484                                                                              |
| Polar              | Southern | ANTA     | 294.5                                            | 1.07                                                                   | 0.58  | 26         | 8.87                                                                        | 9.53                                                                 | 165                                                                              |
| Polar              | Southern | APLR     | 120.9                                            | 0.44                                                                   | 0.04  | 3          | 1.93                                                                        | 0.85                                                                 | 398                                                                              |
| <b>1000-2000 m</b> |          |          |                                                  | <b>1.91</b>                                                            |       | <b>274</b> | <b>265.7</b><br>(81%)                                                       | <b>225.7</b>                                                         |                                                                                  |

(Continued)

| Domain             | Ocean    | Province | Biomass at<br>2000-3000 m<br>mgC·m <sup>-2</sup> | Remineralization<br>2000-3000 m<br>gC·m <sup>-2</sup> ·y <sup>-1</sup> | SD   | n          | Area of<br>provinces<br>10 <sup>6</sup> Km <sup>2</sup><br>Longhurst (1995) | Remineralization<br>2000-3000 m<br>TgC·y <sup>-1</sup><br>This study | Primary<br>Production<br>gC·m <sup>-2</sup> ·y <sup>-1</sup><br>Longhurst (1995) |
|--------------------|----------|----------|--------------------------------------------------|------------------------------------------------------------------------|------|------------|-----------------------------------------------------------------------------|----------------------------------------------------------------------|----------------------------------------------------------------------------------|
| Trades             | Atlantic | NATR     | 17.70                                            | 0.06                                                                   | 0.09 | 2          | 8.27                                                                        | 0.53                                                                 | 106                                                                              |
|                    |          | WTRA     | 10.60                                            | 0.04                                                                   | 0.04 | 2          | 5.36                                                                        | 0.21                                                                 | 130                                                                              |
|                    |          | SATL     | 80.00                                            | 0.29                                                                   | 0.37 | 2          | 17.77                                                                       | 5.19                                                                 | 75                                                                               |
| Trades             | Indian   | MONS     | 78.00                                            | 0.28                                                                   | 0.11 | 22         | 14.21                                                                       | 4.05                                                                 | 105                                                                              |
|                    |          | ISSG     | 117.00                                           | 0.43                                                                   | 0.2  | 5          | 19.25                                                                       | 8.22                                                                 | 71                                                                               |
| Trades             | Pacific  | NPTG     | 26.50                                            | 0.1                                                                    | 0.09 | 4          | 21.09                                                                       | 2.04                                                                 | 59                                                                               |
|                    |          | PNEC     | 34.10                                            | 0.12                                                                   | 0.03 | 3          | 8.17                                                                        | 1.02                                                                 | 107                                                                              |
|                    |          | PEQD     | 12.00                                            | 0.04                                                                   | 0.01 | 2          | 10.34                                                                       | 0.45                                                                 | 113                                                                              |
|                    |          | WARM     | 27.60                                            | 0.1                                                                    |      | 1          | 16.78                                                                       | 1.69                                                                 | 82                                                                               |
| Westerlies         | Atlantic | NADR     | 102.50                                           | 0.37                                                                   | 0.21 | 8          | 3.5                                                                         | 1.31                                                                 | 240                                                                              |
|                    |          | GFST     | 2556.00                                          | 9.33                                                                   |      | 1          | 1.1                                                                         | 10.26                                                                | 178                                                                              |
|                    |          | MEDI     | 18.50                                            | 0.07                                                                   | 0.03 | 18         | 3.08                                                                        | 0.21                                                                 | 216                                                                              |
|                    |          | NASE     | 39.00                                            | 0.14                                                                   | 0.16 | 5          | 4.45                                                                        | 0.63                                                                 | 122                                                                              |
| Westerlies         | Pacific  | PSAW     | 1168.80                                          | 4.27                                                                   | 1.54 | 9          | 2.9                                                                         | 12.37                                                                | 264                                                                              |
|                    |          | KURO     | 385.00                                           | 1.41                                                                   |      | 1          | 3.7                                                                         | 5.2                                                                  | 193                                                                              |
|                    |          | NPSW     | 8.80                                             | 0.03                                                                   | 0.07 | 3          | 3.93                                                                        | 0.13                                                                 | 109                                                                              |
|                    |          | SPSG     | 10.20                                            | 0.04                                                                   | 0.02 | 3          | 37.29                                                                       | 1.39                                                                 | 87                                                                               |
| Coastal            | Indian   | REDS     | 9.60                                             | 0.04                                                                   | 0.04 | 3          | 0.56                                                                        | 0.02                                                                 | 617                                                                              |
|                    |          | ARAB     | 135.20                                           | 0.49                                                                   | 0.1  | 9          | 2.93                                                                        | 1.45                                                                 | 454                                                                              |
|                    |          | EAFR     | 224.20                                           | 0.82                                                                   |      | 1          | 3.72                                                                        | 3.04                                                                 | 190                                                                              |
| Coastal            | Atlantic | BENG     | 110.50                                           | 0.4                                                                    |      | 1          | 1.13                                                                        | 0.46                                                                 | 323                                                                              |
| Coastal            | Pacific  | CHIL     | 115.80                                           | 0.42                                                                   | 0.02 | 2          | 0.96                                                                        | 0.41                                                                 | 388                                                                              |
| Polar              |          | ARCTIC   | 323.80                                           | 1.18                                                                   | 9.26 | 6          | 2.1                                                                         | 2.48                                                                 | 484                                                                              |
| <b>2000-3000 m</b> |          |          |                                                  | <b>0.89</b>                                                            |      | <b>113</b> | <b>192.59</b><br>(59%)                                                      | <b>62.74</b>                                                         |                                                                                  |

(Continued)

| Domain             | Ocean    | Province | Biomass at<br>3000-4000 m<br>mgC·m <sup>-2</sup> | Remineralization<br>3000-4000 m<br>gC·m <sup>-2</sup> ·y <sup>-1</sup> | SD   | n         | Area of<br>provinces<br>10 <sup>6</sup> Km <sup>2</sup><br>Longhurst (1995) | Remineralization<br>3000-4000 m<br>TgC·y <sup>-1</sup><br>This study | Primary<br>Production<br>gC·m <sup>-2</sup> ·y <sup>-1</sup><br>Longhurst (1995) |
|--------------------|----------|----------|--------------------------------------------------|------------------------------------------------------------------------|------|-----------|-----------------------------------------------------------------------------|----------------------------------------------------------------------|----------------------------------------------------------------------------------|
| Trades             | Atlantic | NATR     | 0.62                                             | 0.002                                                                  |      | 1         | 8.27                                                                        | 0.02                                                                 | 106                                                                              |
| Trades             | Indian   | MONS     | 46.7                                             | 0.17                                                                   | 0.14 | 10        | 14.21                                                                       | 2.42                                                                 | 105                                                                              |
|                    |          | ISSG     | 78                                               | 0.28                                                                   | 0.2  | 2         | 19.25                                                                       | 5.48                                                                 | 71                                                                               |
| Trades             | Pacific  | NPTG     | 26.4                                             | 0.1                                                                    |      | 1         | 21.09                                                                       | 2.03                                                                 | 59                                                                               |
|                    |          | PNEC     | 34.8                                             | 0.13                                                                   |      | 1         | 8.17                                                                        | 1.04                                                                 | 107                                                                              |
|                    |          | WARM     | 7.7                                              | 0.03                                                                   |      | 1         | 16.78                                                                       | 0.47                                                                 | 82                                                                               |
| Westerlies         | Atlantic | NADR     | 67.3                                             | 0.25                                                                   | 0.14 | 9         | 3.5                                                                         | 0.86                                                                 | 240                                                                              |
|                    |          | MEDI     | 9                                                | 0.03                                                                   | 0.69 | 14        | 3.08                                                                        | 0.1                                                                  | 216                                                                              |
|                    |          | NASE     | 19.4                                             | 0.07                                                                   | 0.04 | 4         | 4.45                                                                        | 0.32                                                                 | 122                                                                              |
| Westerlies         | Pacific  | PSAW     | 169.2                                            | 0.62                                                                   | 0.21 | 9         | 2.9                                                                         | 1.79                                                                 | 264                                                                              |
|                    |          | KURO     | 29                                               | 0.11                                                                   |      | 1         | 3.7                                                                         | 0.39                                                                 | 193                                                                              |
|                    |          | NPSW     | 19                                               | 0.07                                                                   | 0.03 | 4         | 3.93                                                                        | 0.27                                                                 | 109                                                                              |
|                    |          | ARAB     | 67.1                                             | 0.24                                                                   | 0.07 | 8         | 2.93                                                                        | 0.72                                                                 | 454                                                                              |
| Polar              |          | ARCTIC   | 51.6                                             | 0.19                                                                   |      | 1         | 2.1                                                                         | 0.4                                                                  | 484                                                                              |
| <b>3000-4000 m</b> |          |          |                                                  | <b>0.16</b>                                                            |      | <b>66</b> | <b>114.36</b><br>(35%)                                                      | <b>16.31</b>                                                         |                                                                                  |

Supplementary Table 5. Domain, ocean and data source information used for the zooplankton vertical distribution review. “This study” refers to data obtained during the Malaspina Expedition.

| Domain     | Ocean                                                                                                                        | Province   | Authors                                                                                                                                                                        |      |                                                                                                                                                                                                                     |
|------------|------------------------------------------------------------------------------------------------------------------------------|------------|--------------------------------------------------------------------------------------------------------------------------------------------------------------------------------|------|---------------------------------------------------------------------------------------------------------------------------------------------------------------------------------------------------------------------|
| Trades     | Atlantic                                                                                                                     | NATR       | This study<br>Angel and Baker (1982) <sup>1*</sup>                                                                                                                             |      |                                                                                                                                                                                                                     |
|            |                                                                                                                              | WTRA       | This study                                                                                                                                                                     |      |                                                                                                                                                                                                                     |
|            |                                                                                                                              | SATL       | This study                                                                                                                                                                     |      |                                                                                                                                                                                                                     |
| Trades     | Indian                                                                                                                       | MONS       | Foxtan (1956) <sup>2</sup><br>Vinogradov (1970) <sup>3</sup><br>Grice and Hulsemann (1967) <sup>4*</sup><br>Foxtan (1956) <sup>2</sup><br>Koppelman et al. (2000) <sup>5</sup> |      |                                                                                                                                                                                                                     |
|            |                                                                                                                              | ISSG       | This study<br>Vinogradov (1970) <sup>3</sup><br>Grice and Hulsemann (1967) <sup>4*</sup><br>Foxtan (1956) <sup>2</sup>                                                         |      |                                                                                                                                                                                                                     |
|            |                                                                                                                              | NPTG       | This study<br>Vinogradov (1970) <sup>3</sup>                                                                                                                                   |      |                                                                                                                                                                                                                     |
|            |                                                                                                                              | PNEC       | This study<br>Vinogradov (1970) <sup>3</sup>                                                                                                                                   |      |                                                                                                                                                                                                                     |
|            |                                                                                                                              | PEQD       | This study<br>Vinogradov (1970) <sup>3</sup>                                                                                                                                   |      |                                                                                                                                                                                                                     |
| Trades     | Pacific                                                                                                                      | WARM       | Vinogradov (1970) <sup>3</sup>                                                                                                                                                 |      |                                                                                                                                                                                                                     |
|            |                                                                                                                              | ARCH       | Vinogradov (1970) <sup>3</sup>                                                                                                                                                 |      |                                                                                                                                                                                                                     |
|            |                                                                                                                              | Westerlies | Atlantic                                                                                                                                                                       | NADR | Koppelman and Weikert (1992) <sup>6</sup><br>Koppelman and Weikert (1999) <sup>7</sup><br>Angel and Baker (1982) <sup>1*</sup><br>Vinogradov et al (1998) <sup>8</sup>                                              |
|            |                                                                                                                              |            |                                                                                                                                                                                | GFST | Weikert and Trinkaus (1990) <sup>9</sup><br>Weikert et al. (2001) <sup>10</sup><br>Koppelman and Weikert (2007) <sup>11</sup><br>Koppelman et al. (2004) <sup>12</sup><br>Minutoli & Guglielmo (2012) <sup>13</sup> |
|            |                                                                                                                              |            |                                                                                                                                                                                | MEDI | Weikert et al. (2001) <sup>10</sup><br>Koppelman and Weikert (2007) <sup>11</sup><br>Koppelman et al. (2004) <sup>12</sup><br>Minutoli & Guglielmo (2012) <sup>13</sup>                                             |
| NASE       | This study<br>Roe (1988) <sup>14*</sup><br>Grice and Hulsemann (1965) <sup>15*</sup><br>Angel and Baker (1982) <sup>1*</sup> |            |                                                                                                                                                                                |      |                                                                                                                                                                                                                     |
| Westerlies | Pacific                                                                                                                      | PSAW       | Vinogradov (1970) <sup>3</sup><br>Yamaguchi et al (2004) <sup>16</sup>                                                                                                         |      |                                                                                                                                                                                                                     |
|            |                                                                                                                              | KURO       | Vinogradov (1970) <sup>3</sup><br>Yamaguchi et al (2004) <sup>16</sup>                                                                                                         |      |                                                                                                                                                                                                                     |
|            |                                                                                                                              | NPSW       | Vinogradov (1970) <sup>3</sup><br>Yamaguchi et al (2004) <sup>16</sup>                                                                                                         |      |                                                                                                                                                                                                                     |
|            |                                                                                                                              | SPSG       | This study<br>Vinogradov (1970) <sup>3</sup>                                                                                                                                   |      |                                                                                                                                                                                                                     |
|            |                                                                                                                              | SSTC       | This study<br>Foxtan (1956) <sup>2</sup>                                                                                                                                       |      |                                                                                                                                                                                                                     |
| Westerlies | Southern                                                                                                                     | SANT       | Foxtan (1956) <sup>2</sup>                                                                                                                                                     |      |                                                                                                                                                                                                                     |
| Coastal    | Indian                                                                                                                       | REDS       | Wishner (1980) <sup>17*</sup><br>Weikert (1982) <sup>18</sup>                                                                                                                  |      |                                                                                                                                                                                                                     |
|            |                                                                                                                              | ARAB       | Koppelman et al. (2000) <sup>5</sup><br>Grice and Hulsemann (1967) <sup>4*</sup><br>Böttger-Schnack (1996) <sup>19</sup>                                                       |      |                                                                                                                                                                                                                     |
|            |                                                                                                                              | BENG       | Koppelman (unpubl.)                                                                                                                                                            |      |                                                                                                                                                                                                                     |
|            |                                                                                                                              | EAFR       | This study                                                                                                                                                                     |      |                                                                                                                                                                                                                     |
|            |                                                                                                                              | AUSW       | This study                                                                                                                                                                     |      |                                                                                                                                                                                                                     |
| Coastal    | Pacific                                                                                                                      | CCAL       | Wishner (1980) <sup>17*</sup>                                                                                                                                                  |      |                                                                                                                                                                                                                     |
|            |                                                                                                                              | AUSE       | This study                                                                                                                                                                     |      |                                                                                                                                                                                                                     |
| Polar      | Atlantic                                                                                                                     | SARC       | Vinogradov et al (1998) <sup>8</sup><br>Grice and Hulsemann (1965) <sup>15*</sup>                                                                                              |      |                                                                                                                                                                                                                     |
|            |                                                                                                                              | ARCTIC     | Richter (1994) <sup>20*</sup>                                                                                                                                                  |      |                                                                                                                                                                                                                     |
| Polar      | Southern                                                                                                                     | ANTA       | Foxtan (1956) <sup>2</sup>                                                                                                                                                     |      |                                                                                                                                                                                                                     |
| Polar      | Southern                                                                                                                     | APLR       | Foxtan (1956) <sup>2</sup>                                                                                                                                                     |      |                                                                                                                                                                                                                     |

Supplementary Table 6. Reviewed values of carbon export and sequestration of particulate organic carbon (POC) flux, active flux due to zooplankton and micronekton, and estimated dissolved organic carbon (DOC) flux used to build Figure 4. Numbers in blue were used as lower and higher values in the range given in Figure 4. Values in red were considered outliers and they were not accounted in the Figure.

| System       | Flux or Respiration                          | Depth (m)    | Authors                                       | $\mu\text{molC}\cdot\text{m}^{-3}\cdot\text{d}^{-1}$ | $\text{mmolC}\cdot\text{m}^{-2}\cdot\text{d}^{-1}$ | $\text{mgC}\cdot\text{m}^{-2}\cdot\text{d}^{-1}$    | $\text{gC}\cdot\text{m}^{-2}\cdot\text{y}^{-1}$             | Comments                                                         |      |                                         |
|--------------|----------------------------------------------|--------------|-----------------------------------------------|------------------------------------------------------|----------------------------------------------------|-----------------------------------------------------|-------------------------------------------------------------|------------------------------------------------------------------|------|-----------------------------------------|
| Oligotrophic | Mesopelagic POC flux                         | 150          | Martin et al. (1987) <sup>21</sup>            |                                                      |                                                    | 35.5                                                | 13.0                                                        | VERTEX 14-35°N                                                   |      |                                         |
|              |                                              | 150          | Knauer et al. (1990) <sup>22</sup>            |                                                      |                                                    | 31.2                                                | 11.4                                                        | VERTEX 33°N                                                      |      |                                         |
|              |                                              | 150          | Karl et al. (1996) <sup>23</sup>              |                                                      |                                                    | 36.0                                                | 13.1                                                        | Aver. HOT 1989 (Table 3)                                         |      |                                         |
|              |                                              | 150          | Karl et al. (1996) <sup>23</sup>              |                                                      |                                                    | 35.0                                                | 12.8                                                        | Aver. HOT 1990 (Table 3)                                         |      |                                         |
|              |                                              | 150          | Karl et al. (1996) <sup>23</sup>              |                                                      |                                                    | 27.0                                                | 9.9                                                         | Aver. HOT 1991 (Table 3)                                         |      |                                         |
|              |                                              | 150          | Karl et al. (1996) <sup>23</sup>              |                                                      |                                                    | 22.0                                                | 8.0                                                         | Aver. HOT 1992 (Table 3)                                         |      |                                         |
|              |                                              | 150          | Karl et al. (1996) <sup>23</sup>              |                                                      |                                                    | 25.0                                                | 9.1                                                         | Aver. HOT 1993 (Table 3)                                         |      |                                         |
|              |                                              | 150          | Hernández-León et al. (2019) <sup>24</sup>    |                                                      |                                                    | 11.3                                                | 4.1                                                         | Aver. sts 2-7 and 14 (Table 1)                                   |      |                                         |
|              |                                              | 200          | Miquel et al. (2011) <sup>25</sup>            |                                                      |                                                    |                                                     | 2.4                                                         | Aver. 1988-2005 (Table 2)                                        |      |                                         |
|              |                                              | 150          | Buesseler et al. (2007) <sup>26</sup>         |                                                      |                                                    | 18.0                                                | 6.6                                                         | Hawaii Aloha st.                                                 |      |                                         |
|              |                                              | 150          | Buesseler et al. (2007) <sup>26</sup>         |                                                      |                                                    | 18.0                                                | 6.6                                                         | Hawaii Aloha st.                                                 |      |                                         |
|              |                                              | Bathypelagic | POC flux                                      | 1000                                                 | Miquel et al. (2011) <sup>25</sup>                 |                                                     |                                                             |                                                                  | 1.6  | Mediterranean Aver. 1988-2005 (Table 2) |
|              |                                              |              |                                               | 2000                                                 | Guidi et al. (2015) <sup>27</sup>                  |                                                     |                                                             |                                                                  | 1.44 | Range 0.1-9.3                           |
|              |                                              |              |                                               | 2000                                                 | Henson et al. (2012) <sup>28</sup>                 |                                                     |                                                             |                                                                  | 1.74 | Range 0-35                              |
|              |                                              |              |                                               | 2000                                                 | Henson et al. (2012) <sup>28</sup>                 |                                                     |                                                             |                                                                  | 0.5  | About 0.5 for oligotrophic gyres        |
| 2000         | Martin et al. (1987) <sup>21</sup>           |              |                                               |                                                      |                                                    |                                                     | 0.8                                                         | Range 0.8-7.0                                                    |      |                                         |
| 2000         | Lutz et al. (2007) <sup>29</sup>             |              |                                               |                                                      |                                                    |                                                     | 0.2                                                         | Range 0.2-7.0                                                    |      |                                         |
| 2000         | Honjo et al. (2008) <sup>30</sup>            |              |                                               |                                                      |                                                    |                                                     | 0.3                                                         | Range 0.3-7.3                                                    |      |                                         |
| Mesopelagic  | Active flux                                  | 200          | Hidaka et al. (2001) <sup>31</sup>            |                                                      |                                                    | 27.9                                                | 10.2                                                        | Western equatorial North Pacific (3°N)                           |      |                                         |
|              |                                              | 200          | Hidaka et al. (2001) <sup>31</sup>            |                                                      |                                                    | 12.2                                                | 4.5                                                         | Western equatorial North Pacific (3° 30' N)                      |      |                                         |
|              |                                              | 200          | Ariza et al. (2015) <sup>32</sup>             |                                                      |                                                    | 6.4                                                 | 2.3                                                         | Canary Current                                                   |      |                                         |
|              |                                              | 200          | Hernández-León et al. (2019) <sup>24</sup>    |                                                      |                                                    | 3.2                                                 | 1.2                                                         | St 3 South Equatorial Counter Current                            |      |                                         |
|              |                                              | 200          | Hernández-León et al. (2019) <sup>24</sup>    |                                                      |                                                    | 12.6                                                | 4.6                                                         | St 6 South Equatorial Current                                    |      |                                         |
|              |                                              | 200          | Hernández-León et al. (2019) <sup>24</sup>    |                                                      |                                                    | 23.1                                                | 8.4                                                         | St 7 North Equatorial Counter Current                            |      |                                         |
|              |                                              | 200          | Hernández-León et al. (2019) <sup>24</sup>    |                                                      |                                                    | 12.2                                                | 4.5                                                         | St 12 Canary Current                                             |      |                                         |
| Mesopelagic  | respiration                                  | 100-1000     | Nagata et al. (2000) <sup>33</sup>            |                                                      | 2.9                                                | 34.8                                                | 12.7                                                        | Geomean Table 10.4 Aristegui et al. (2005)                       |      |                                         |
|              |                                              | 200-1000     | Santana-Falcón et al. (2017) <sup>34</sup>    |                                                      |                                                    |                                                     | 7.0                                                         | Tropical and temperate North Atlantic Ocean                      |      |                                         |
|              |                                              | 200-1000     | Aristegui et al. (2003a) <sup>35</sup>        |                                                      |                                                    |                                                     | 35.0                                                        |                                                                  |      |                                         |
|              |                                              | >200         | Aristegui et al. (2003b) <sup>36</sup>        | 4                                                    | 48.0                                               | 17.5                                                | Lower range in the Eastern Subtropical North Atlantic gyre  |                                                                  |      |                                         |
|              |                                              | >200         | Aristegui et al. (2003b) <sup>36</sup>        | 8                                                    | 96.0                                               | 35.0                                                | Higher range in the Eastern Subtropical North Atlantic gyre |                                                                  |      |                                         |
|              |                                              | 200-1000     | Jenkins and Wallace (1992) <sup>37</sup>      |                                                      |                                                    |                                                     | 39.6                                                        | Atlantic Ocean (Sagasso Sea)                                     |      |                                         |
|              |                                              | 200-1000     | Packard et al. (1988) <sup>38</sup>           |                                                      |                                                    |                                                     | 18.0                                                        | Atlantic Ocean (Sagasso Sea)                                     |      |                                         |
|              |                                              | 200-1000     | Aristegui et al. (2003a) <sup>35</sup>        |                                                      |                                                    |                                                     | 28.8                                                        | Atlantic Ocean (Canary Islands)                                  |      |                                         |
|              |                                              | 200-800      | Savenkoff et al. (1993) <sup>39</sup>         |                                                      |                                                    |                                                     | 26.4                                                        | Mediterranean Sea (west)                                         |      |                                         |
|              |                                              | 200-1000     | Lefevre et al. (1996) <sup>40</sup>           |                                                      |                                                    |                                                     | 14.4                                                        | Mediterranean Sea (west)                                         |      |                                         |
|              |                                              | 200-1000     | Baltar et al. (2009) <sup>41</sup>            | 5.90                                                 | 4.72                                               | 56.6                                                | 20.7                                                        | North Equatorial Counter Current (ETS in 900-1000 m depth)       |      |                                         |
|              |                                              | 200-1000     | Baltar et al. (2009) <sup>41</sup>            | 2.49                                                 | 1.992                                              | 23.9                                                | 8.7                                                         | Subtropical Gyre (ETS in 900-1000 m depth)                       |      |                                         |
|              |                                              | 200-1000     | Baltar et al. (2009) <sup>41</sup>            | 16.30                                                | 13.04                                              | 156.5                                               | 57.1                                                        | North Equatorial Counter Current (ETS in 250-500 m depth OMZ)    |      |                                         |
|              |                                              | 200-1000     | Baltar et al. (2009) <sup>41</sup>            | 13.50                                                | 10.8                                               | 129.6                                               | 47.3                                                        | Subtropical Gyre (ETS in 250-500 m depth OMZ)                    |      |                                         |
| 150-700      | Fernández-Castro et al. (2016) <sup>42</sup> |              |                                               |                                                      | 30.7                                               | Mean value Time series station ESTOC Canary Current |                                                             |                                                                  |      |                                         |
| Bathypelagic | respiration                                  | >1000        | Nagata et al. (2000) <sup>33</sup>            | 0.1                                                  | 1.2                                                | 0.4                                                 | N Subtropical Pacific                                       |                                                                  |      |                                         |
|              |                                              | >1000        | Packard et al. (1988) <sup>38</sup>           |                                                      |                                                    | 8.0                                                 | Sargasso Sea                                                |                                                                  |      |                                         |
| Zooplankton  | mesopelagic respiration                      | 150-1000     | Hernández-León and Ikeda (2005) <sup>43</sup> | 0.21                                                 | 2.5                                                | 0.9                                                 | Lower range of values for the mesopelagic zone              |                                                                  |      |                                         |
|              |                                              | 150-1000     | Hernández-León and Ikeda (2005) <sup>43</sup> | 14                                                   | 168.0                                              | 61.3                                                | Higher range of values for the mesopelagic zone             |                                                                  |      |                                         |
|              |                                              | 150-1000     | Hernández-León and Ikeda (2005) <sup>43</sup> | 1.7                                                  | 20.4                                               | 7.4                                                 | Average value for the mesopelagic zone                      |                                                                  |      |                                         |
|              |                                              | 200-900      | Hernández-León (unpublished)                  |                                                      |                                                    | 5.22                                                | 1.9                                                         | Coca I cruise. Respiration by day. Oceanic zone Canary Current   |      |                                         |
|              |                                              | 200-900      | Hernández-León (unpublished)                  |                                                      |                                                    | 12.17                                               | 4.4                                                         | Coca I cruise. Respiration by day. Oceanic zone Canary Current   |      |                                         |
|              |                                              | 200-900      | Hernández-León (unpublished)                  |                                                      |                                                    | 10.54                                               | 3.8                                                         | Coca I cruise. Respiration by day. Oceanic zone Canary Current   |      |                                         |
|              |                                              | 200-900      | Hernández-León (unpublished)                  |                                                      |                                                    | 9.40                                                | 3.4                                                         | Coca I cruise. Respiration by day. Oceanic zone Canary Current   |      |                                         |
|              |                                              | 200-900      | Hernández-León (unpublished)                  |                                                      |                                                    | 10.57                                               | 3.9                                                         | Coca I cruise. Respiration by day. Oceanic zone Canary Current   |      |                                         |
|              |                                              | 200-900      | Hernández-León (unpublished)                  |                                                      |                                                    | 26.25                                               | 9.6                                                         | Coca I cruise. Respiration by day. Oceanic zone Canary Current   |      |                                         |
|              |                                              | 200-900      | Hernández-León (unpublished)                  |                                                      |                                                    | 18.66                                               | 6.8                                                         | Coca I cruise. Respiration by day. Oceanic zone Canary Current   |      |                                         |
|              |                                              | 200-900      | Hernández-León (unpublished)                  |                                                      |                                                    | 10.55                                               | 3.9                                                         | Coca I cruise. Respiration by night. Oceanic zone Canary Current |      |                                         |
|              |                                              | 200-900      | Hernández-León (unpublished)                  |                                                      |                                                    | 20.06                                               | 7.3                                                         | Coca I cruise. Respiration by night. Oceanic zone Canary Current |      |                                         |
|              |                                              | 200-900      | Hernández-León (unpublished)                  |                                                      |                                                    | 4.17                                                | 1.5                                                         | Coca I cruise. Respiration by night. Oceanic zone Canary Current |      |                                         |
|              |                                              | 200-900      | Hernández-León (unpublished)                  |                                                      |                                                    | 12.88                                               | 4.7                                                         | Coca I cruise. Respiration by night. Oceanic zone Canary Current |      |                                         |
|              |                                              | 200-900      | Hernández-León (unpublished)                  |                                                      |                                                    | 8.59                                                | 3.1                                                         | Coca I cruise. Respiration by night. Oceanic zone Canary Current |      |                                         |
|              |                                              | 200-900      | Hernández-León (unpublished)                  |                                                      |                                                    | 26.99                                               | 9.9                                                         | Coca I cruise. Respiration by night. Oceanic zone Canary Current |      |                                         |
|              |                                              | 200-900      | Hernández-León (unpublished)                  |                                                      |                                                    | 21.20                                               | 7.7                                                         | Coca I cruise. Respiration by night. Oceanic zone Canary Current |      |                                         |
| Zooplankton  |                                              | 1000-4000    | Childress and Thuesen (1992) <sup>44</sup>    |                                                      | 0.1                                                | 0.05                                                | Hypothetical central oceanic region                         |                                                                  |      |                                         |
| Bathypelagic | Respiration                                  | 1000-2250    | Koppelman and Weikert (1999) <sup>7</sup>     | 0.11                                                 | 1.3                                                | 0.5                                                 | Spring                                                      |                                                                  |      |                                         |
|              |                                              | 1000-2250    | Koppelman and Weikert (1999) <sup>7</sup>     | 0.32                                                 | 3.8                                                | 1.4                                                 | Summer                                                      |                                                                  |      |                                         |
|              |                                              | >2250        | Koppelman and Weikert (1999) <sup>7</sup>     | 0.03                                                 | 0.4                                                | 0.1                                                 | Spring                                                      |                                                                  |      |                                         |
|              |                                              | >2250        | Koppelman and Weikert (1999) <sup>7</sup>     | 0.03                                                 | 0.4                                                | 0.1                                                 | Summer                                                      |                                                                  |      |                                         |
|              |                                              | 1000-4000    | Hernández-León and Ikeda (2005) <sup>43</sup> | 0.32                                                 | 3.8                                                | 1.4                                                 | Average value for the bathypelagic zone                     |                                                                  |      |                                         |
|              |                                              | 1000-2000    | This study                                    |                                                      |                                                    |                                                     | 1.9                                                         |                                                                  |      |                                         |
|              |                                              | 2000-3000    | This study                                    |                                                      |                                                    |                                                     | 0.9                                                         |                                                                  |      |                                         |
| 3000-4000    | This study                                   |              |                                               |                                                      | 0.2                                                |                                                     |                                                             |                                                                  |      |                                         |

## Supplementary Table 6 (cont.).

| System                                     | Flux or Respiration        | Depth (m)                           | Authors                                    | $\mu\text{molC}\cdot\text{m}^{-3}\cdot\text{d}^{-1}$ | $\text{mmolC}\cdot\text{m}^{-2}\cdot\text{d}^{-1}$ | $\text{mgC}\cdot\text{m}^{-2}\cdot\text{d}^{-1}$ | $\text{gC}\cdot\text{m}^{-2}\cdot\text{y}^{-1}$ | Comments                                                         |                                                            |
|--------------------------------------------|----------------------------|-------------------------------------|--------------------------------------------|------------------------------------------------------|----------------------------------------------------|--------------------------------------------------|-------------------------------------------------|------------------------------------------------------------------|------------------------------------------------------------|
| Productive                                 | Mesopelagic<br>POC flux    |                                     | Karl et al. (1996) <sup>23</sup>           |                                                      |                                                    | 42.0                                             | 15.3                                            | Coastal zone (Table 4)                                           |                                                            |
|                                            |                            |                                     | Karl et al. (1996) <sup>23</sup>           |                                                      |                                                    | 85.0                                             | 31.0                                            | Upwelling zone (Table 4)                                         |                                                            |
|                                            |                            | 150                                 | Hernández-León et al. (2019) <sup>24</sup> |                                                      |                                                    | 26.0                                             | 9.5                                             | Aver. sts 8 and 11 (Table 1)                                     |                                                            |
|                                            |                            | 150                                 | Buesseler et al. (2007) <sup>26</sup>      |                                                      |                                                    | 62                                               | 22.6                                            | Northwest Pacific Subarctic gyre St K2                           |                                                            |
|                                            |                            | 150                                 | Buesseler et al. (2007) <sup>26</sup>      |                                                      |                                                    | 23                                               | 8.4                                             | Northwest Pacific Subarctic gyre St K2                           |                                                            |
|                                            | Bathypelagic<br>POC flux   | 1000                                | Helmké et al. (2005) <sup>45</sup>         |                                                      |                                                    |                                                  | 20.6                                            | 7.5                                                              | Aver. 4 years NW Africa                                    |
|                                            |                            | 2000                                | Henson et al. (2012) <sup>28</sup>         |                                                      |                                                    |                                                  |                                                 | 3.0                                                              | 3-4 for equatorial and Arabian upwelling                   |
|                                            |                            | 2000                                | Martin et al. (1987) <sup>21</sup>         |                                                      |                                                    |                                                  |                                                 | 7.0                                                              | Range 0.8-7.0                                              |
|                                            |                            | 2000                                | Lutz et al. (2007) <sup>29</sup>           |                                                      |                                                    |                                                  |                                                 | 7.0                                                              | Range 0.2-7.0                                              |
|                                            |                            | 2000                                | Honjo et al. (2008) <sup>30</sup>          |                                                      |                                                    |                                                  |                                                 | 7.3                                                              | Range 0.3-7.3                                              |
|                                            | Mesopelagic<br>Active flux | 200                                 | Hernández-León et al. (2019) <sup>24</sup> |                                                      |                                                    |                                                  | 43.0                                            | 15.7                                                             | St 9 Guinea Dome                                           |
|                                            |                            | 200                                 | Hernández-León et al. (2019) <sup>24</sup> |                                                      |                                                    |                                                  | 85.0                                            | 31.0                                                             | St 11 Oceanic upwelling off C. Blanc                       |
|                                            | Mesopelagic<br>respiration | 100-1000                            | Nagata et al. (2000) <sup>33</sup>         |                                                      | 42                                                 |                                                  | 504.0                                           | 184.0                                                            | Santa Monica Basin                                         |
|                                            |                            | >200                                | Aristegui et al. (2003b) <sup>36</sup>     |                                                      | 5                                                  |                                                  | 60.0                                            | 21.9                                                             | Lower range in the Coastal Transition Zone Canary Current  |
|                                            |                            | >200                                | Aristegui et al. (2003b) <sup>36</sup>     |                                                      | 10                                                 |                                                  | 120.0                                           | 43.8                                                             | Higher range in the Coastal Transition Zone Canary Current |
|                                            |                            | 150-1000                            | Packard et al. (2015) <sup>46</sup>        |                                                      | 3.49                                               |                                                  | 41.9                                            | 15.3                                                             | Upwelling zone off Perú (Tabla 5)                          |
|                                            |                            | 150-1000                            | Packard et al. (2015) <sup>46</sup>        |                                                      | 344.93                                             |                                                  | 4139.2                                          | 1510.8                                                           | Upwelling zone off Perú (Tabla 5)                          |
|                                            |                            | 150-1000                            | Packard et al. (2015) <sup>46</sup>        |                                                      | 11.46                                              |                                                  | 137.5                                           | 50.2                                                             | Upwelling zone off Perú (Tabla 5)                          |
|                                            |                            | 150-1000                            | Packard et al. (2015) <sup>46</sup>        |                                                      | 2.43                                               |                                                  | 29.2                                            | 10.6                                                             | Upwelling zone off Perú (Tabla 5)                          |
|                                            |                            | 150-1000                            | Packard et al. (2015) <sup>46</sup>        |                                                      | 2.72                                               |                                                  | 32.6                                            | 11.9                                                             | Upwelling zone off Perú (Tabla 5)                          |
|                                            |                            | 150-1000                            | Packard et al. (2015) <sup>46</sup>        |                                                      | 19.57                                              |                                                  | 234.8                                           | 85.7                                                             | Upwelling zone off Perú (Tabla 5)                          |
|                                            |                            | 150-1000                            | Packard et al. (2015) <sup>46</sup>        |                                                      | 3.53                                               |                                                  | 42.4                                            | 15.5                                                             | Upwelling zone off Perú (Tabla 5)                          |
|                                            |                            | 150-1000                            | Packard et al. (2015) <sup>46</sup>        |                                                      | 6.3                                                |                                                  | 75.6                                            | 27.6                                                             | Upwelling zone off Perú (Tabla 5)                          |
| Bathypelagic<br>respiration                |                            | >1000                               | Packard et al. (1988) <sup>38</sup>        |                                                      |                                                    |                                                  |                                                 | 31.3                                                             | Pacific Ocean (Costa Rica Dome)                            |
|                                            |                            | >1000                               | Turley and Mackie (1994) <sup>47</sup>     |                                                      | 0.4                                                |                                                  | 4.8                                             | 1.8                                                              | NE Atlantic                                                |
|                                            | >1000                      | Nagata et al. (2000) <sup>33</sup>  |                                            | 0.5                                                  |                                                    | 6.0                                              | 2.2                                             | Subarctic Pacific                                                |                                                            |
|                                            | >1000                      | Packard et al. (2015) <sup>46</sup> |                                            | 3.07                                                 |                                                    | 36.8                                             | 13.4                                            | Upwelling zone off Perú (Tabla 5)                                |                                                            |
|                                            | >1000                      | Packard et al. (2015) <sup>46</sup> |                                            | 0.38                                                 |                                                    | 4.6                                              | 1.7                                             | Upwelling zone off Perú (Tabla 5)                                |                                                            |
|                                            | >1000                      | Packard et al. (2015) <sup>46</sup> |                                            | 0.34                                                 |                                                    | 4.1                                              | 1.5                                             | Upwelling zone off Perú (Tabla 5)                                |                                                            |
|                                            | >1000                      | Packard et al. (2015) <sup>46</sup> |                                            | 22.51                                                |                                                    | 270.1                                            | 98.6                                            | Upwelling zone off Perú (Tabla 5)                                |                                                            |
|                                            | >1000                      | Packard et al. (2015) <sup>46</sup> |                                            | 0.79                                                 |                                                    | 9.5                                              | 3.5                                             | Upwelling zone off Perú (Tabla 5)                                |                                                            |
| Zooplankton<br>mesopelagic<br>respiration  | 200-900                    | Hernández-León (unpublished)        |                                            |                                                      |                                                    | 22.6                                             | 8.3                                             | Coca I cruise. Respiration by day. Upwelling zone Canary Current |                                                            |
|                                            | 200-900                    | Hernández-León (unpublished)        |                                            |                                                      |                                                    | 90.4                                             | 33.0                                            | Coca I cruise. Respiration by day. Oceanic zone Canary Current   |                                                            |
|                                            | 200-900                    | Hernández-León (unpublished)        |                                            |                                                      |                                                    | 21.6                                             | 7.9                                             | Coca I cruise. Respiration by night. Oceanic zone Canary Current |                                                            |
|                                            | 200-900                    | Hernández-León (unpublished)        |                                            |                                                      |                                                    | 62.2                                             | 22.7                                            | Coca I cruise. Respiration by night. Oceanic zone Canary Current |                                                            |
| Zooplankton<br>bathypelagic<br>respiration | 1000-2000                  | This study                          |                                            |                                                      |                                                    |                                                  | 1.0                                             | Coastal                                                          |                                                            |
|                                            | 1000-2000                  | This study                          |                                            |                                                      |                                                    |                                                  | 3.0                                             | Westerlies                                                       |                                                            |



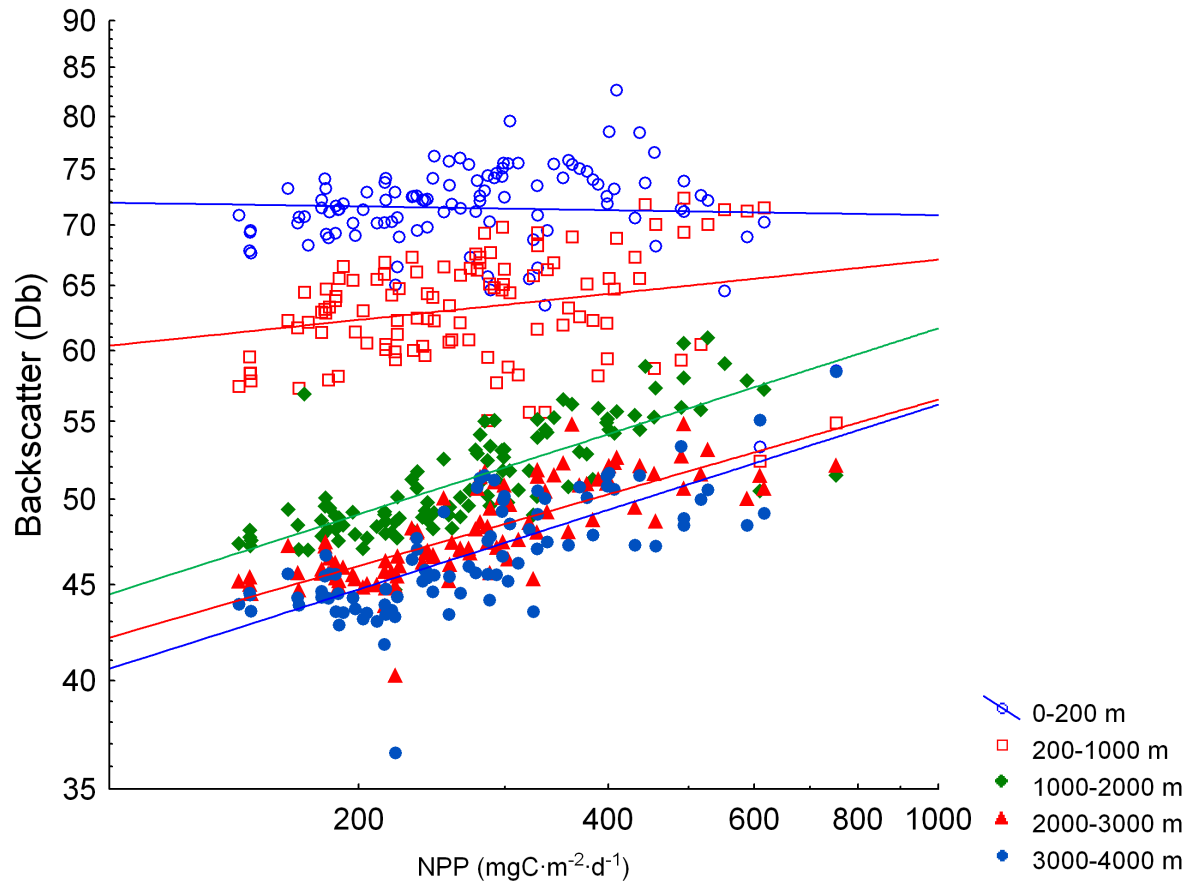

Supplementary Figure 1. Relationships between net primary production and the backscatter signal (dB) obtained from the Lowered Acoustic Doppler Current Profiler (LADCP) attached to the CTD rosette in epipelagic (0-200 m), mesopelagic (200-1000 m), and the upper (1000-2000 m), intermediate (2000-3000 m), and lower (3000-4000 m) bathypelagic layers. A large variability was found in the epipelagic layer (0-200 m depth) in relation to primary production because of the mismatch of measuring biomass or backscatter at a given time during the cruise and the remote sensing average used for primary production in a rather highly dynamic system as the epipelagic zone. Here, the higher primary production was observed in the coastal domain (mainly close to upwelling zones), but this high values were not coupled to high backscatter in the epipelagic zone or even in the mesopelagic zone. However, it was better correlated in the bathypelagic zone as the biomass proxy there is the result of long-term primary production in the upper layers.

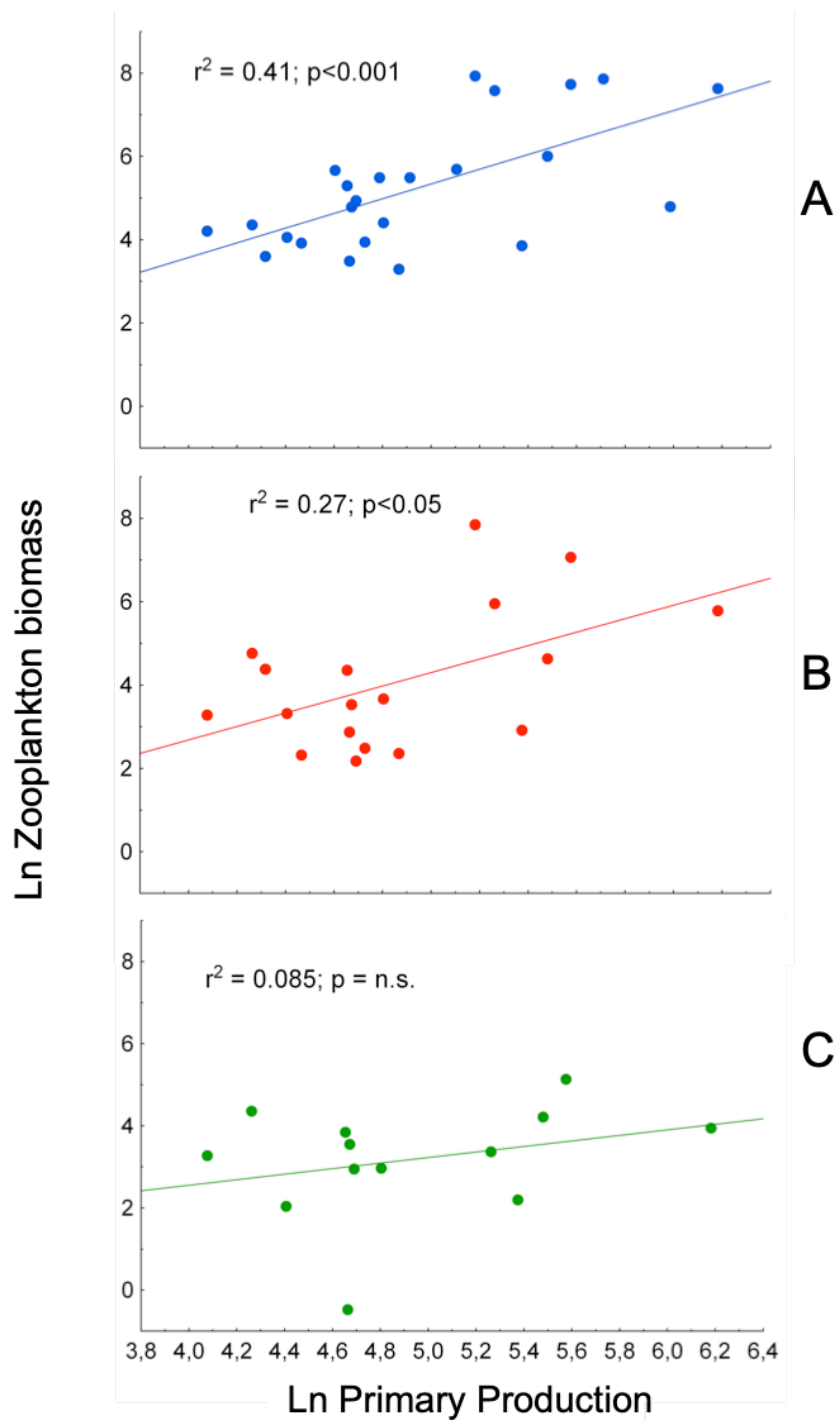

Supplementary Figure 2. Relationships between Longhurst primary production and average zooplankton biomass for the different provinces of Trades, Westerlies, and Polar domains, and excluding the coastal one, for (A) the upper (1000-2000 m), (B) intermediate (2000-3000 m), and (C) lower (3000-4000 m) bathypelagic layers. n.s. stand for not significant.

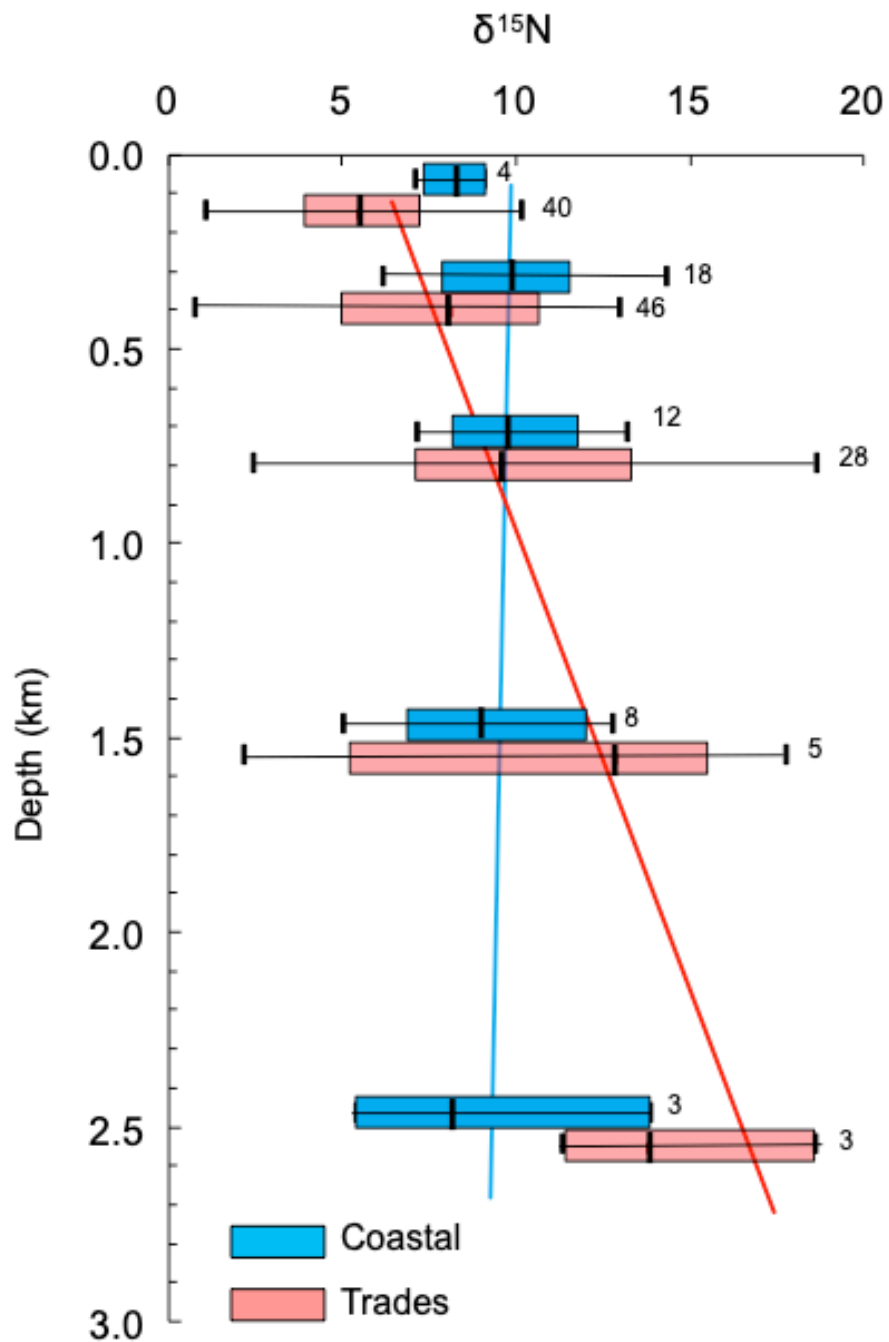

Supplementary Figure 3. Box and whisker vertical profiles of zooplankton  $\delta^{15}\text{N}$  for Coastal and Trades biomes. For each depth interval, the median is indicated by a thick horizontal line, the box encompasses the 25% and 75% percentiles, and the whiskers the minimum and maximum values. The number of data is indicated for each box. The lines represent the fitted regression equations using all data shown in Supplementary Table 2.

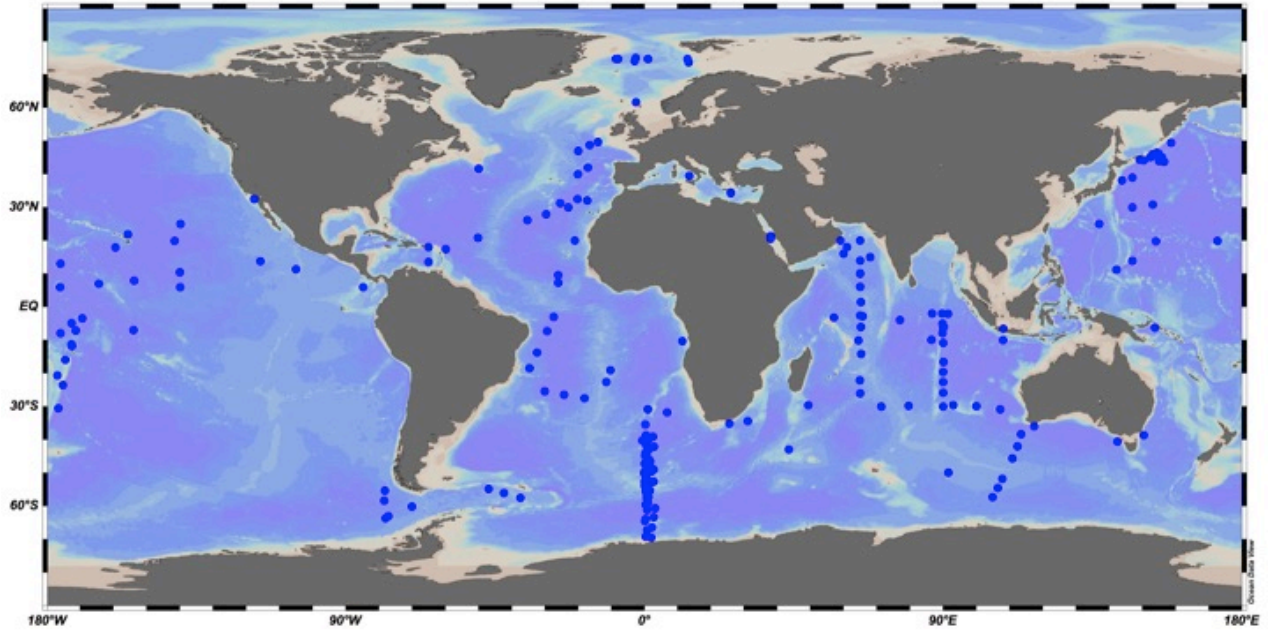

Supplementary Figure 4. Location of stations of reviewed zooplankton vertical profiles in the present study.

## References

1. Angel M.V., Baker A. Vertical distribution of the standing crop of plankton and micronekton at three stations in the northeast Atlantic. *Biol. Oceanogr.* **2**, 1-30 (1982).
2. Foxton P. The distribution of the standing crop of zooplankton in the Southern Ocean. *Discovery Rep.* **28**, 191-236 (1956).
3. Vinogradov M.E. Vertical distribution of the Oceanic Zooplankton (Israel Program for Scientific Translations) 333 pp (Jerusalem) (1970)
4. Grice G.D., Hulsemann K. Bathypelagic calanoid copepods of the western Indian Ocean. *Proc. U.S. Natl. Mus.* **122**, 1-67 (1967).
5. Koppelman R., Schäfer P., Schiebel R. Organic carbon losses measured by heterotrophic activity of mesozooplankton and CaCO<sub>3</sub> flux in the bathypelagic zone of the Arabian Sea. *Deep-Sea Res. II* **47**, 169-187 (2000).
6. Koppelman R., Weikert H. Full-depth zooplankton profiles over the deep bathyal of the NE Atlantic. *Mar. Ecol. Prog. Ser.* **86**, 263-263 (1992).
7. Koppelman R., Weikert H. Temporal changes of deep-sea mesozooplankton abundance in the temperate NE Atlantic and estimates of the carbon budget. *Mar. Ecol. Prog. Ser.* **179**, 27-40 (1999).
8. Vinogradov M.E., Shushkina E.A., Nezhlin N.P., Arnautov G.N. Vertical distribution of zooplankton in the frontal zone of the Gulf Stream and Labrador Current. *J. Plankton Res.* **20**, 85-103 (1998).
9. Weikert H., Trinkaus S. Vertical mesozooplankton abundance and distribution in the deep Eastern Mediterranean Sea SE of Crete. *J. Plankton Res.* **12**, 601-628 (1990).
10. Weikert H., Koppelman R., Wiegatz S. Evidence of episodic changes in deep-sea mesozooplankton abundance and composition in the Levantine Sea (Eastern Mediterranean). *J. Mar. Syst.* **30**, 221-239 (2001).
11. Koppelman R., Weikert H. Spatial and temporal distribution patterns of deep-sea mesozooplankton in the eastern Mediterranean—indications of a climatically induced shift? *Mar. Ecol.* **28**, 259-275 (2007).
12. Koppelman R., Weikert H., Halsband-Lenk C., Jennerjahn T. Mesozooplankton community respiration and its relation to particle flux in the oligotrophic eastern Mediterranean. *Global Biogeochem. Cycles* **18**, GB1039, doi:10.1029/2003GB002121 (2004).
13. Minutoli R., Guglielmo L. Mesozooplankton carbon requirement in the Tyrrhenian Sea: its vertical distribution, diel variability and relation to particle flux. *Mar. Ecol. Prog. Ser.* **446**, 91-105 (2012).

14. Roe H.S.J. Midwater biomass profiles over the Madeira Abyssal Plain and the contribution of copepods. *Hydrobiologia* **167**, 169-181 (1988).
15. Grice G.D., Hulsemann K. Abundance, vertical distribution and taxonomy of calanoid copepods at selected stations in the northeast Atlantic. *Proc. Zool. Soc. London* **146**, 213-262 (1965).
16. Yamaguchi A., Watanabe Y., Ishida H., Harimoto T., Furusawa K., Suzuki S., Takahashi M. Latitudinal differences in the planktonic biomass and community structure down to the greater depths in the western North Pacific. *J. Oceanography* **60**, 773-787 (2004).
17. Wishner K.F. The biomass of the deep-sea benthopelagic plankton. *Deep-Sea Res.* **27**, 203-216 (1980).
18. Weikert H. The Vertical Distribution of Zooplankton in Relation to Habitat Zones in the Area of the Atlantis II Deep, Central Red Sea. *Mar. Ecol. Prog. Ser.* **8**, 129-143 (1982).
19. Böttger-Schnack R. Vertical structure of small metazoan plankton, especially non-calanoïd copepods. I. Deep Arabian Sea. *J. Plankton Res.* **18**, 1073-1101 (1996).
20. Richter C. Regional and seasonal variability in the vertical distribution of mesozooplankton in the Greenland Sea. *Ber. Polarforsch.* **154**, 1-90 (1994).
21. Martin, J.H., Knauer, G.A., Karl, D.M., Broenkow, W.W. VERTEX: Carbon cycling in the northeast Pacific. *Deep-Sea Res.* **34**, 267-285 (1987).
22. Knauer, G.A., Redalje, D.G., Harrison, W.G., Karl, D.M. New production at the VERTEX time-series site. *Deep-Sea Res.* **37**, 1121-1134 (1990).
23. Karl, D.M., Christian, J.R., Dore, J.E., Hebel, D.V., Letelier, R.M., Tupas, L.M., Winn, C.D. Seasonal and interannual variability in primary production and particle flux at Station ALOHA. *Deep-Sea Res. II* **43**, 539-568 (1996).
24. Hernández-León, S., Olivar, P., Fernández de Puellas, M.L., Bode, A., Castellón, A., López-Pérez, C., Tuset, V.M., González-Gordillo, J.I. Zooplankton and micronekton active flux across the tropical and subtropical Atlantic Ocean. *Front. Mar. Sci.* **6**, 535, doi: 10.3389/ fmars.2019.00535 (2019).
25. Miquel, J.C., Martín, J., Gasser, B., Rodríguez-y-Baena, A., Toubal, T., Fowler, S.W. Dynamics of particle flux and carbon export in the northwestern Mediterranean Sea: A two decade time-series study at the DYFAMED site. *Progress oceanogr* **91**, 461-481 (2011).
26. Buesseler, K.O., Lamborg, C.H., Boyd, P.W., Lam, P.J., Trull, T.W., Bidigare, R.R., Bishop, J.K.B., Casciotti, K.L., Dehairs, F., Elskens, M., Honda, M., Karl, D.M., Siegel, D.A., Silver, M.W., Steinberg, D.K., Valdes, J., Van Mooy, B., Wilson, S. Revisiting carbon flux through the ocean's twilight zone. *Science*, **316**(5824), 567-570 (2007).

27. Guidi L., Legendre L., Reygondeau G., Uitz J., Stemann L., Henson S.A. A new look at ocean carbon remineralization for estimating deep-water sequestration. *Global Biogeochem. Cycles* **29**, 1044-1059 (2015).
28. Henson S.A., Sanders R., Madsen E. Global patterns in efficiency of particulate organic carbon export and transfer to the deep ocean. *Global Biogeochem. Cycles* **26**, GB1028, doi:10.1029/2011GB004099 (2012).
29. Lutz M.J., Caldeira K., Dunbar R.B., Behrenfeld M.J. Seasonal rhythms of net primary production and particulate organic carbon flux to depth describe the efficiency of biological pump in the global ocean. *J. Geophys. Res.* **112**, C10011, doi:10.1029/2006JC003706 (2007).
30. Honjo S., Manganini S.J., Krishfield R.A., Francois R. Particulate organic carbon fluxes to the ocean interior and factors controlling the biological pump: A synthesis of global sediment trap programs since 1983. *Progr. Oceanogr.* **76**, 217-285 (2008).
31. Hidaka K., Kawaguchi K., Murakami M., Takahashi M. Downward transport of organic carbon by diel migratory micronekton in the western equatorial Pacific: its quantitative and qualitative importance. *Deep-Sea Res. I* **48**, 1923-1939 (2001).
32. Ariza A.V., Landeira J.M., Escánez A., Wienerroither R.M., Aguilar N., Røstad A., Kaartvedt S., Hernández-León S. Vertical distribution, composition and migratory patterns of acoustic scattering layers in the Canary Islands. *J. Mar. Syst.* **157**, 82-91 (2016).
33. Nagata, T., Fukuda, H., Fukuda, R., Koike, I. Bacterioplankton distribution and production in deep Pacific waters: large-scale geographic variations and possible coupling with sinking particle fluxes. *Limnol. Oceanogr.* **45**, 426-435 (2000).
34. Santana-Falcón, Y., Álvarez-Salgado, X.A., Pérez-Hernández, M.D., Hernández-Guerra, A., Mason, E., Arístegui, J. Organic carbon budget for the eastern boundary of the North Atlantic subtropical gyre: major role of DOC in mesopelagic respiration. *Sci. rep.* **7**, 10129 DOI:10.1038/s41598-017-10974-y (2017).
35. Arístegui J., Agustí S., Duarte C.M. Respiration in the dark ocean. *Geophys. Res. Lett.* **30**, 1041, doi:10.1029/2002GL016227 (2003a).
36. Arístegui, J., Barton, E.D., Montero, M.F., García-Muñoz, M., Escánez, J. Organic carbon distribution and water column respiration in the NW Africa-Canaries Coastal Transition Zone. *Aquat. Microbial Ecol.* **33**, 289-301 (2003b).
37. Jenkins, W.J., Wallace, D.W.R. Tracer based inferences of new primary production in the sea. In *Primary productivity and biogeochemical cycles in the sea* (pp. 299-316). Springer, Boston, MA (1992).
38. Packard, T.T., Denis, M., Rodier, M., Garfield, P. Deep-ocean metabolic CO<sub>2</sub> production: calculations from ETS activity. *Deep-Sea Res.* **35**, 371-382 (1988).

39. Savenkoff, C., Prieur, L., Reys, J.P., Lefevre, D., Dallot, S., Denis, M. Deep microbial communities evidenced in the Liguro-Provençal front by their ETS activity. *Deep-Sea Res. I* **40**, 709-725 (1993).
40. Lefevre, D., Denis, M., Lambert, C.E., Miquel, J.C. Is DOC the main source of organic matter remineralization in the ocean water column?. *J. Mar. Syst.* **7**, 281-291 (1996).
41. Baltar, F., Arístegui, J., Gasol, J.M., Sintes, E., Herndl, G.J. Evidence of prokaryotic metabolism on suspended particulate organic matter in the dark waters of the subtropical North Atlantic. *Limnol. Oceanogr.* **54**, 182-193 (2009).
42. Fernández-Castro, B., Arístegui, J., Anderson, L., Montero, M.F., Hernández-León, S., Marañón, E., Mourino-Carballido, B. Mesopelagic respiration near the ESTOC (European Station for Time-Series in the Ocean, 15.5° W, 29.1° N) site inferred from a tracer conservation model. *Deep-Sea Res. I* **115**, 63-73 (2016).
43. Hernández-León, S., Ikeda, T. A global assessment of mesozooplankton respiration in the ocean. *J. Plankton Res.* **27**, 153-158 (2005).
44. Childress, J.J., Thuesen, E.V. Metabolic potential of deep-sea animals: regional and global scales. In *Deep-sea food chains and the global carbon cycle* (pp. 217-236). Springer, Dordrecht (1992).
45. Helmke, P., Romero, O., Fischer, G. Northwest African upwelling and its effect on offshore organic carbon export to the deep sea. *Global Biogeochem. Cycles* **19**, GB4015, doi:10.1029/2004GB002265 (2005).
46. Packard, T.T., Osma, N., Fernández-Urruzola, I., Codispoti, L.A., Christensen, J.P., Gómez, M. Peruvian upwelling plankton respiration: calculations of carbon flux, nutrient retention efficiency, and heterotrophic energy production. *Biogeosciences* **12**, 2641–2654 (2015)
47. Turley, C.M., Mackie, P.J. Biogeochemical significance of attached and free-living bacteria and the flux of particles in the NE Atlantic Ocean. *Mar. Ecol. Progr. Ser.* **115**, 191-191 (1994).
