# Supplementary material for: Large deep-sea zooplankton biomass mirrors primary production in the global ocean
Source: PubMed Central journal article supplement (PMC7695708; doi:10.1038/s41467-020-19875-7), 2020-11-27
Supplement: 41467_2020_19875_MOESM3_ESM.pdf [file 41467_2020_19875_MOESM3_ESM.pdf]

## Reporting Summary

Nature Research wishes to improve the reproducibility of the work that we publish. This form provides structure for consistency and transparency in reporting. For further information on Nature Research policies, see [Authors & Referees](#) and the [Editorial Policy Checklist](#).

### Statistics

For all statistical analyses, confirm that the following items are present in the figure legend, table legend, main text, or Methods section.

n/a Confirmed

- |                                     |                                     |                                                                                                                                                                                                                                                            |
|-------------------------------------|-------------------------------------|------------------------------------------------------------------------------------------------------------------------------------------------------------------------------------------------------------------------------------------------------------|
| <input type="checkbox"/>            | <input checked="" type="checkbox"/> | The exact sample size ( $n$ ) for each experimental group/condition, given as a discrete number and unit of measurement                                                                                                                                    |
| <input type="checkbox"/>            | <input checked="" type="checkbox"/> | A statement on whether measurements were taken from distinct samples or whether the same sample was measured repeatedly                                                                                                                                    |
| <input type="checkbox"/>            | <input checked="" type="checkbox"/> | The statistical test(s) used AND whether they are one- or two-sided<br><i>Only common tests should be described solely by name; describe more complex techniques in the Methods section.</i>                                                               |
| <input checked="" type="checkbox"/> | <input type="checkbox"/>            | A description of all covariates tested                                                                                                                                                                                                                     |
| <input type="checkbox"/>            | <input checked="" type="checkbox"/> | A description of any assumptions or corrections, such as tests of normality and adjustment for multiple comparisons                                                                                                                                        |
| <input type="checkbox"/>            | <input checked="" type="checkbox"/> | A full description of the statistical parameters including central tendency (e.g. means) or other basic estimates (e.g. regression coefficient) AND variation (e.g. standard deviation) or associated estimates of uncertainty (e.g. confidence intervals) |
| <input type="checkbox"/>            | <input checked="" type="checkbox"/> | For null hypothesis testing, the test statistic (e.g. $F$ , $t$ , $r$ ) with confidence intervals, effect sizes, degrees of freedom and $P$ value noted<br><i>Give <math>P</math> values as exact values whenever suitable.</i>                            |
| <input checked="" type="checkbox"/> | <input type="checkbox"/>            | For Bayesian analysis, information on the choice of priors and Markov chain Monte Carlo settings                                                                                                                                                           |
| <input checked="" type="checkbox"/> | <input type="checkbox"/>            | For hierarchical and complex designs, identification of the appropriate level for tests and full reporting of outcomes                                                                                                                                     |
| <input checked="" type="checkbox"/> | <input type="checkbox"/>            | Estimates of effect sizes (e.g. Cohen's $d$ , Pearson's $r$ ), indicating how they were calculated                                                                                                                                                         |

*Our web collection on [statistics for biologists](#) contains articles on many of the points above.*

### Software and code

Policy information about [availability of computer code](#)

Data collection

Data analysis

For manuscripts utilizing custom algorithms or software that are central to the research but not yet described in published literature, software must be made available to editors/reviewers. We strongly encourage code deposition in a community repository (e.g. GitHub). See the Nature Research [guidelines for submitting code & software](#) for further information.

### Data

Policy information about [availability of data](#)

All manuscripts must include a [data availability statement](#). This statement should provide the following information, where applicable:

- Accession codes, unique identifiers, or web links for publicly available datasets
- A list of figures that have associated raw data
- A description of any restrictions on data availability

Data was submitted to PANGAEA repository:

Hernández-León, Santiago; Bode, Antonio; Irigoien, Xabier; Echevarría, Fidel; Fernández de Puelles, Maria Luz; González-Gordillo, Ignacio; Acuña, José Luis (2020). Zooplankton biomass during the Malaspina Cruise. PANGAEA, <https://doi.org/10.1594/PANGAEA.922974>

Hernández-León, Santiago; Koppelman, Rolf (2020). Review of global zooplankton biomass in the bathypelagic zone. PANGAEA, <https://doi.org/10.1594/PANGAEA.923149>

Hernández-León, Santiago (2020). Carbon export and sequestration in the ocean. PANGAEA, <https://doi.org/10.1594/PANGAEA.923832>

Frailé-Nuez, Eugenio; Hernández-León, Santiago (2020). Lowered Acoustic Doppler Current Profiler (LADCP) backscatter attached to the rosette sampler during the Malaspina Circumnavigation Expedition. Spanish Institute of Oceanography, PANGAEA, <https://doi.org/10.1594/PANGAEA.922619>

Bode, Antonio; Mompeán, Carmen (2020). Stable isotope data of mesozooplankton for depth layers along the Malaspina-2010 expedition. PANGAEA, <https://doi.org/10.1594/PANGAEA.919314>

## Field-specific reporting

Please select the one below that is the best fit for your research. If you are not sure, read the appropriate sections before making your selection.

Life sciences  Behavioural & social sciences  Ecological, evolutionary & environmental sciences

For a reference copy of the document with all sections, see [nature.com/documents/nr-reporting-summary-flat.pdf](https://nature.com/documents/nr-reporting-summary-flat.pdf)

## Ecological, evolutionary & environmental sciences study design

All studies must disclose on these points even when the disclosure is negative.

|                                   |                                                                                                                                                                                                                                                                                                                                                                                                                                                                                                                                                                                                                                                                                                                                                                                                                                                                                                                                                                                                                                                                                                                                                                                     |
|-----------------------------------|-------------------------------------------------------------------------------------------------------------------------------------------------------------------------------------------------------------------------------------------------------------------------------------------------------------------------------------------------------------------------------------------------------------------------------------------------------------------------------------------------------------------------------------------------------------------------------------------------------------------------------------------------------------------------------------------------------------------------------------------------------------------------------------------------------------------------------------------------------------------------------------------------------------------------------------------------------------------------------------------------------------------------------------------------------------------------------------------------------------------------------------------------------------------------------------|
| Study description                 | We reviewed 274 profiles of zooplankton biomass smaller than 5 mm when this information was available but always excluding macrozooplankton and micronekton. Natural abundance of stable nitrogen isotopes was expressed as $\delta^{15}\text{N}$ (‰) relative to atmospheric nitrogen, and determined in zooplankton specimens collected from subsamples of the different water layers. Specific respiration rates were derived from the measurement of the electron transfer system (ETS) activity in those samples from the Malaspina cruise with enough biomass at bathypelagic depths to obtain a subsample and perform the enzymatic assay. Backscatter intensity was measured using a Lowered Acoustic Doppler Current Profiler (LADCP) system equipped with two 300 kHz Teledyne/RDI Workhorses, which were mounted on a CTD rosette sampler and deployed at each cast. Surface integrated primary production was downloaded from the Ocean Productivity web site ( <a href="http://www.science.oregonstate.edu/ocean.productivity/index.php">http://www.science.oregonstate.edu/ocean.productivity/index.php</a> ) using the Vertical Generalized Production Model (VGPM). |
| Research sample                   | Zooplankton biomass, stable isotopes, enzymatic activities, LADCP acoustics, and primary production (see Methods). A fraction of the zooplankton sample was used for analysis of biomass and enzymatic activity. Zooplankton specimens for stable isotope analysis were selected from samples collected in different depth layers between the surface and 2500 m covering a large range of trophic positions: from herbivores to secondary carnivores. Primary production was obtained from available remote sensing data (see text) and acoustics using the IFM-GEOMAR LADCP/LDEO V10 software given above.                                                                                                                                                                                                                                                                                                                                                                                                                                                                                                                                                                        |
| Sampling strategy                 | Global distribution of zooplankton biomass at different depth layers. Zooplankton net samples normally produce a large sample as they filter an important amount of ocean water, and therefore, sample size is considered quite large for our purposes. In deep waters the zooplankton abundance and biomass is lower but when it was small it was only used for abundance and taxonomy and no for isotopes or enzymatic analysis. Here, we only present data when enough sample was obtained for each parameter.                                                                                                                                                                                                                                                                                                                                                                                                                                                                                                                                                                                                                                                                   |
| Data collection                   | Literature review and data collected along the Malaspina cruise around the globe.                                                                                                                                                                                                                                                                                                                                                                                                                                                                                                                                                                                                                                                                                                                                                                                                                                                                                                                                                                                                                                                                                                   |
| Timing and spatial scale          | Global distribution of zooplankton biomass at epi- (0-200 m layer), meso- (200-1000 m layer), and bathypelagic (>1,000 m deep) depths based on data acquired during the Malaspina Circumnavigation Expedition, which surveyed zooplankton biomass in subtropical and tropical oceans during 2010 and 2011, amended with published estimates of deep-sea zooplankton biomass (see Methods). The Malaspina Circumnavigation Expedition started in December 2010 and finished in July 2011, and sampled in tropical and subtropical waters.                                                                                                                                                                                                                                                                                                                                                                                                                                                                                                                                                                                                                                            |
| Data exclusions                   | No data was excluded from the analysis.                                                                                                                                                                                                                                                                                                                                                                                                                                                                                                                                                                                                                                                                                                                                                                                                                                                                                                                                                                                                                                                                                                                                             |
| Reproducibility                   | Not applicable as this is a field sampling as usual in oceanography.                                                                                                                                                                                                                                                                                                                                                                                                                                                                                                                                                                                                                                                                                                                                                                                                                                                                                                                                                                                                                                                                                                                |
| Randomization                     | Not applicable as it is a field sampling in oceanography.                                                                                                                                                                                                                                                                                                                                                                                                                                                                                                                                                                                                                                                                                                                                                                                                                                                                                                                                                                                                                                                                                                                           |
| Blinding                          | Not applicable as it is a field sampling in oceanography.                                                                                                                                                                                                                                                                                                                                                                                                                                                                                                                                                                                                                                                                                                                                                                                                                                                                                                                                                                                                                                                                                                                           |
| Did the study involve field work? | <input checked="" type="checkbox"/> Yes <input type="checkbox"/> No                                                                                                                                                                                                                                                                                                                                                                                                                                                                                                                                                                                                                                                                                                                                                                                                                                                                                                                                                                                                                                                                                                                 |

## Field work, collection and transport

|                          |                                                                                                                                                                                                                                             |
|--------------------------|---------------------------------------------------------------------------------------------------------------------------------------------------------------------------------------------------------------------------------------------|
| Field conditions         | Global distribution of zooplankton biomass at different depth layers surveying zooplankton biomass in subtropical and tropical oceans during 2010 and 2011, amended with published estimates of deep-sea zooplankton biomass (see Methods). |
| Location                 | Tropical and subtropical Atlantic, Pacific, and Indian oceans.                                                                                                                                                                              |
| Access and import/export | No ethical approval was required as we sampled invertebrates.                                                                                                                                                                               |
| Disturbance              | Not applicable as we did not disturb the ocean while sampling.                                                                                                                                                                              |

## Reporting for specific materials, systems and methods

We require information from authors about some types of materials, experimental systems and methods used in many studies. Here, indicate whether each material, system or method listed is relevant to your study. If you are not sure if a list item applies to your research, read the appropriate section before selecting a response.

### Materials & experimental systems

| n/a                                 | Involvement                         | Material/System             |
|-------------------------------------|-------------------------------------|-----------------------------|
| <input checked="" type="checkbox"/> | <input type="checkbox"/>            | Antibodies                  |
| <input checked="" type="checkbox"/> | <input type="checkbox"/>            | Eukaryotic cell lines       |
| <input checked="" type="checkbox"/> | <input type="checkbox"/>            | Palaeontology               |
| <input type="checkbox"/>            | <input checked="" type="checkbox"/> | Animals and other organisms |
| <input checked="" type="checkbox"/> | <input type="checkbox"/>            | Human research participants |
| <input checked="" type="checkbox"/> | <input type="checkbox"/>            | Clinical data               |

### Methods

| n/a                                 | Involvement              | Method                 |
|-------------------------------------|--------------------------|------------------------|
| <input checked="" type="checkbox"/> | <input type="checkbox"/> | ChIP-seq               |
| <input checked="" type="checkbox"/> | <input type="checkbox"/> | Flow cytometry         |
| <input checked="" type="checkbox"/> | <input type="checkbox"/> | MRI-based neuroimaging |

## Animals and other organisms

Policy information about [studies involving animals](#); [ARRIVE guidelines](#) recommended for reporting animal research

Laboratory animals

Not applicable as no laboratory animals were used in the study.

Wild animals

Organisms captured during the Malaspina circumnavigation were collected using a 0.5 m<sup>2</sup> Multinet Sampler (Hydrobios) equipped with 5 nets of 300 µm mesh and a flowmeter to measure the volume of water filtered. Stratified tows were performed by day in vertical hauls from 3000 m to the surface. Samples were then fixed on board and stored in a 4% buffered formalin and seawater for further analysis. Samples for enzymatic activities were frozen immediately in liquid nitrogen.

Field-collected samples

No living animals were used for experimentation.

Ethics oversight

No ethical approval was required as we sampled invertebrates.

Note that full information on the approval of the study protocol must also be provided in the manuscript.
